# Supplementary material
Source: Copernicus journal article supplement (doi:10.5194/egqsj-20-76-1969)

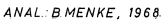

Supplement: Supplementary file 1 [file egqsj-20-76-1969-supplement.zip]

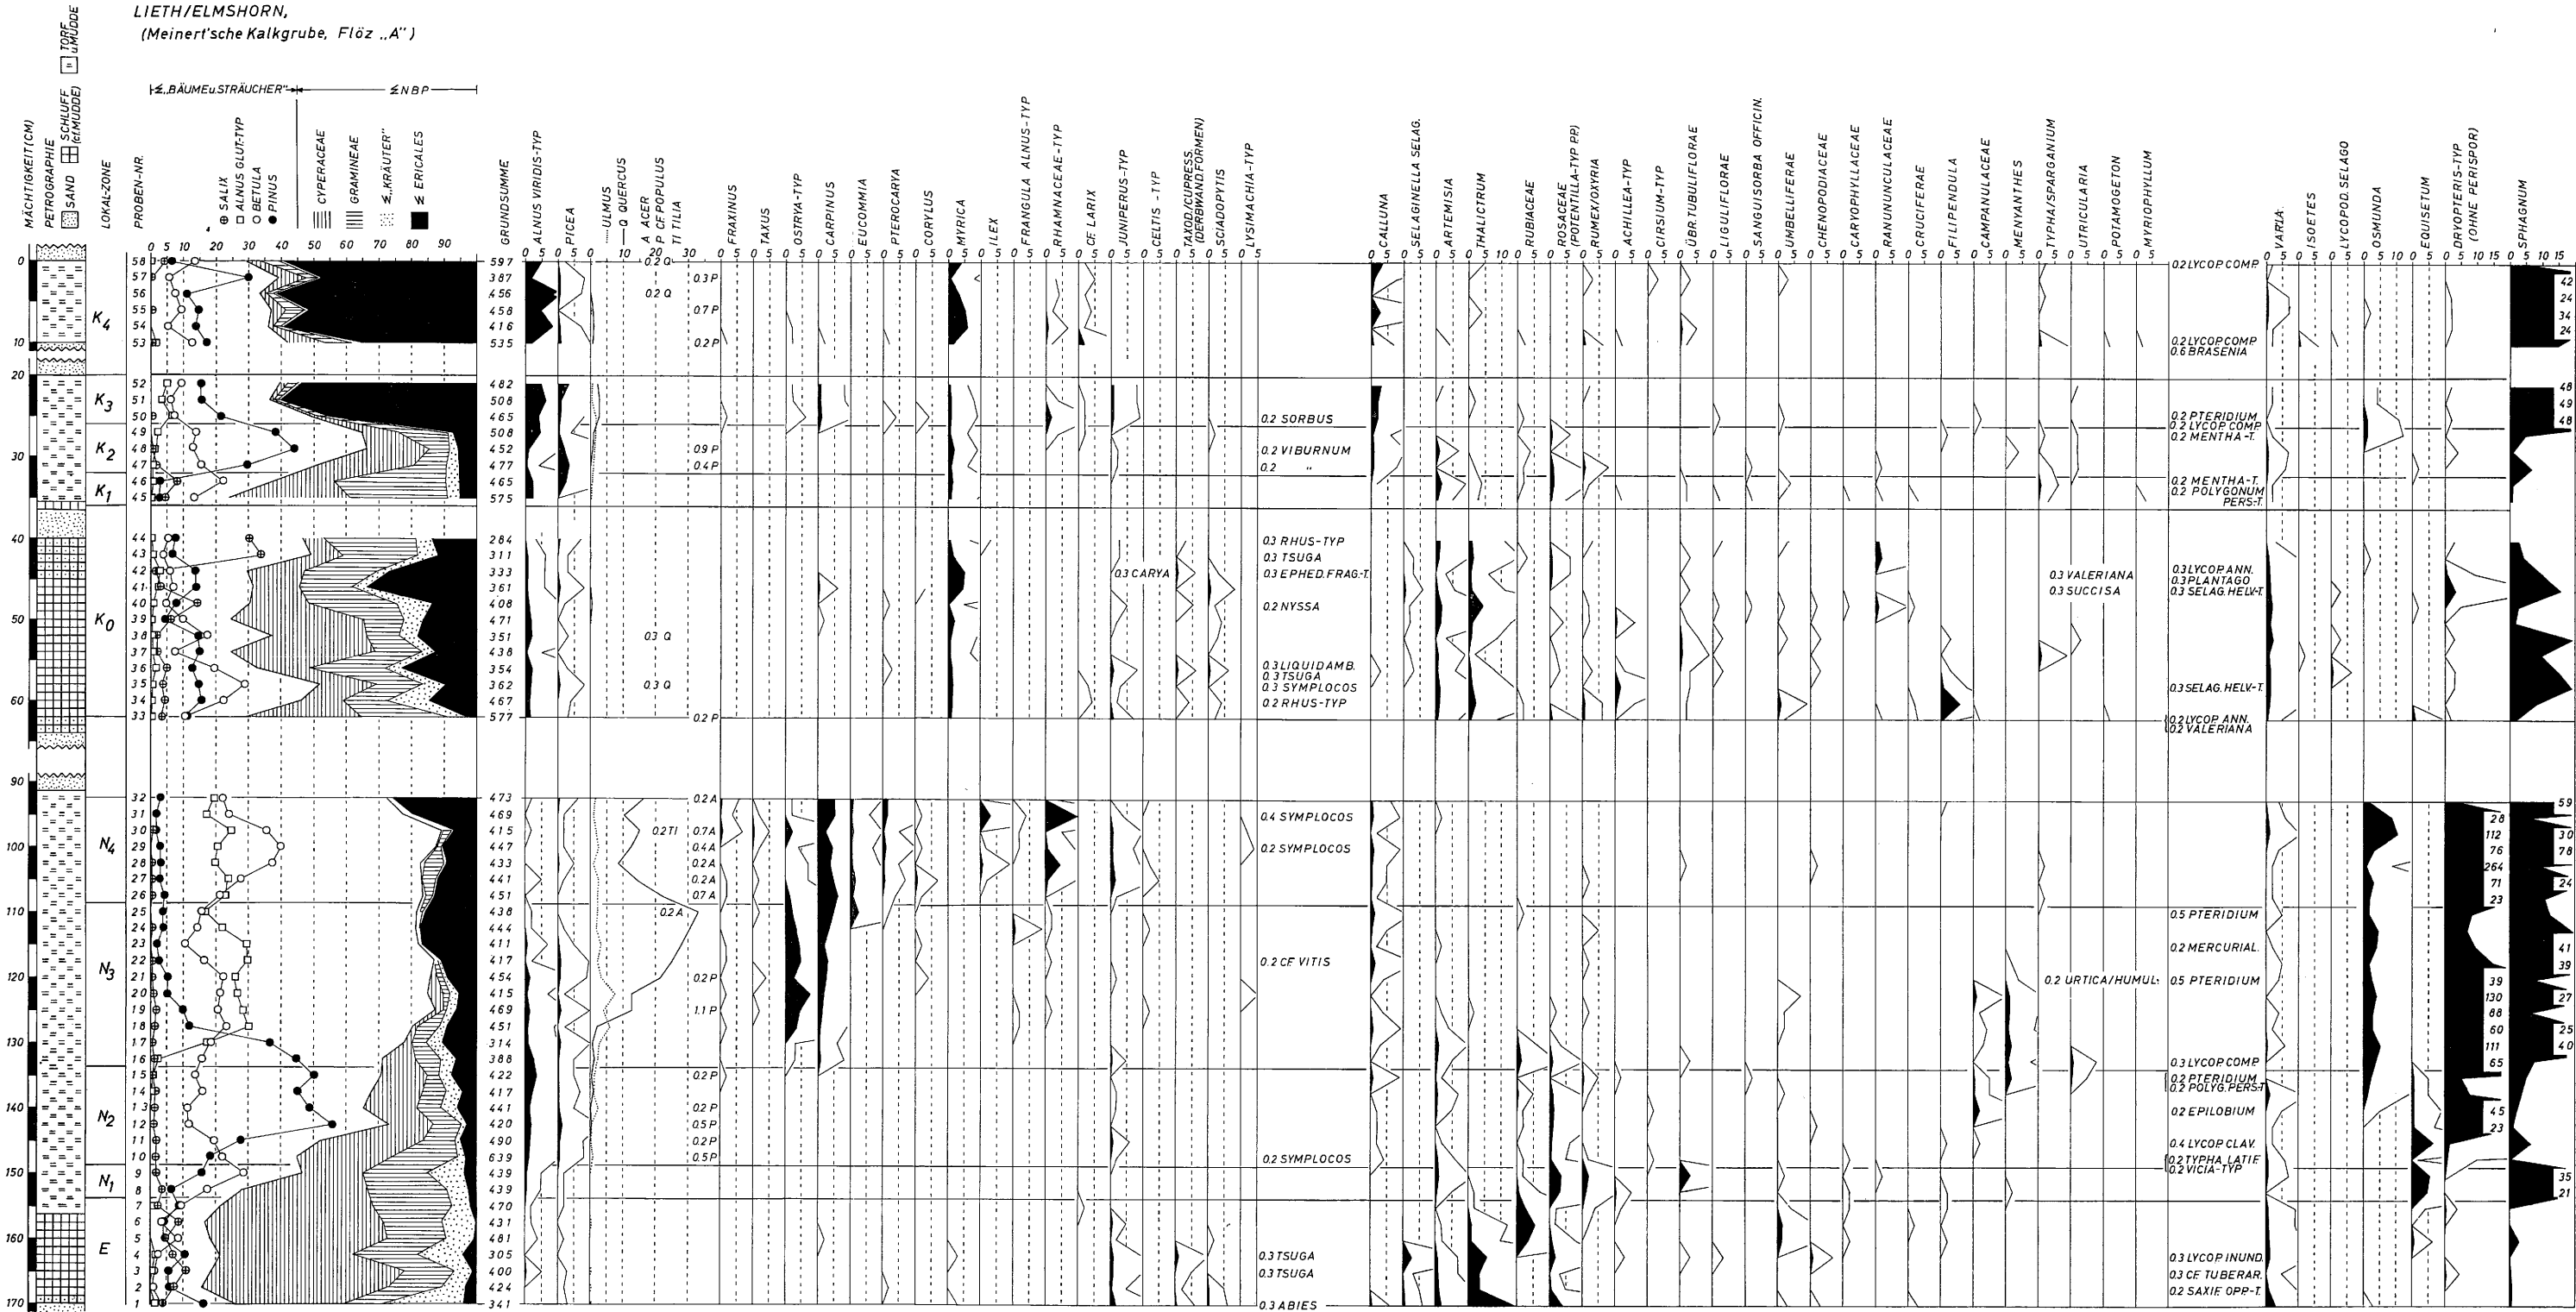

Supplement: Supplementary file 2 [file egqsj-20-76-1969-supplement.zip]

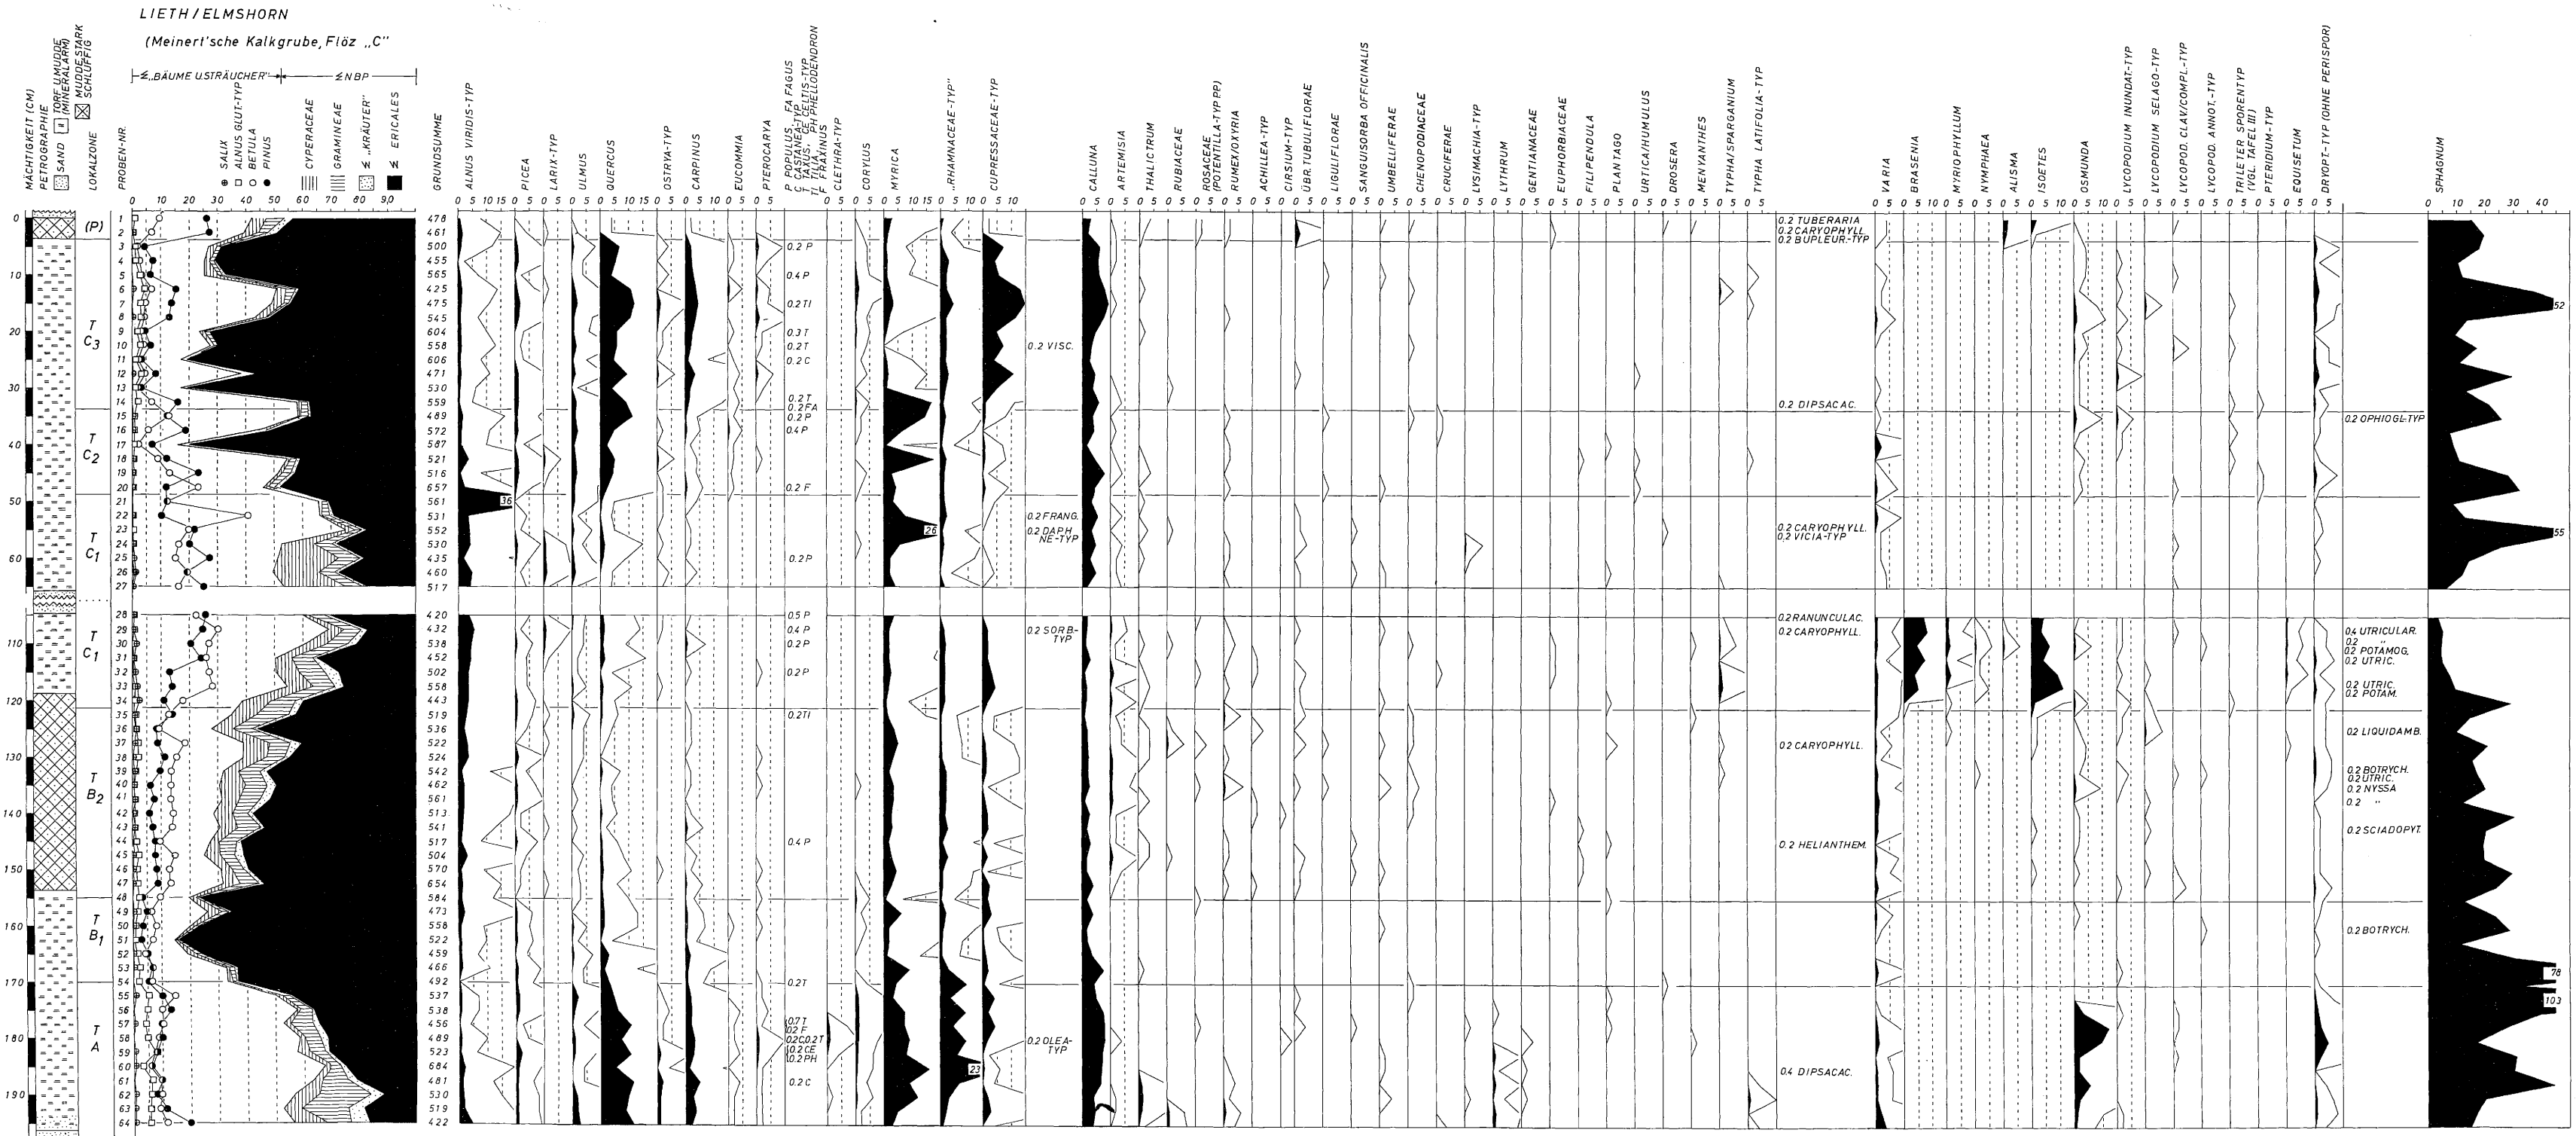

Supplement: Supplementary file 3 [file egqsj-20-76-1969-supplement.zip]

(MEINERT'SCHE KALKGRUBE, PROFIL „BREMSBERG 1966/67")

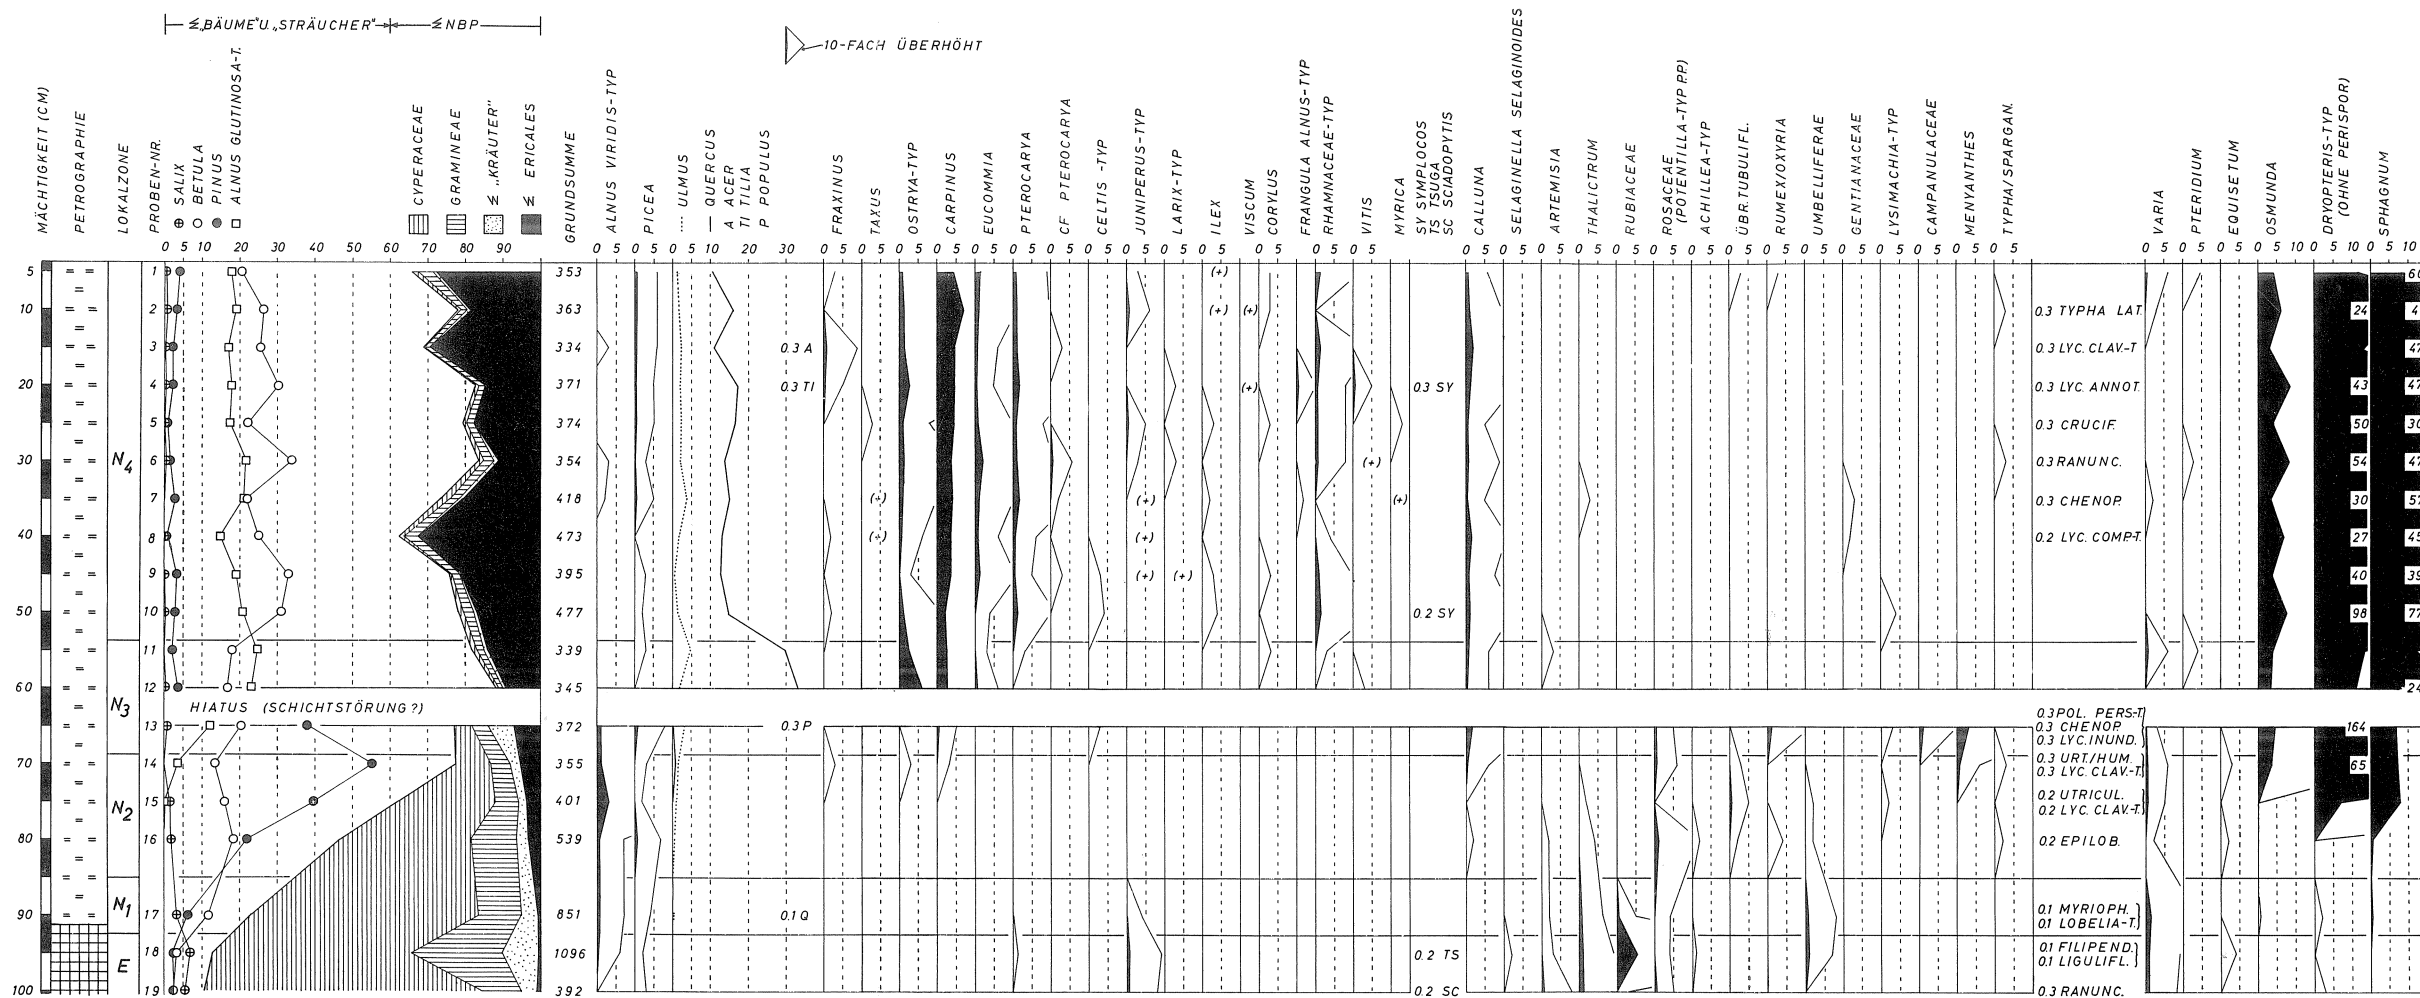

Supplement: Supplementary file 4 [file egqsj-20-76-1969-supplement.zip]
